# Supplementary material for: Imbalance of the intestinal virome and altered viral-bacterial interactions caused by a conditional deletion of the vitamin D receptor
Source: Gut Microbes. 2021 Aug 10;13(1):1957408. doi: 10.1080/19490976.2021.1957408 (PMC8366551; doi:10.1080/19490976.2021.1957408)
Supplement: Supplemental Material [file KGMI_A_1957408_SM0200.xlsx]

## Sheet: S Table 1
VDR∆IEC	p-value		Bacteria		Virus																				Notation:
			s__[Haemophilus] ducreyi	s__Mesorhizobium huakuii	s__Vibrio phage JSF5	s__Bovine viral diarrhea virus 1																			Downregulated Species
	Bacteria	s__[Haemophilus] ducreyi		0.114019	0.790305	0.103968																			Upregulated Species
		s__Mesorhizobium huakuii			0.0580259	0.0495179																			Bacteria and Bacteria Matrix
	Virus	s__Vibrio phage JSF5				0.535653																			Bacteria and Virus Matrix
		s__Bovine viral diarrhea virus 1																							Virus and Virus Matrix
	Correlation value		Bacteria		Virus
			s__[Haemophilus] ducreyi	s__Mesorhizobium huakuii	s__Vibrio phage JSF5	s__Bovine viral diarrhea virus 1
	Bacteria	s__[Haemophilus] ducreyi		-0.531304	-0.0967614	0.544093
		s__Mesorhizobium huakuii			0.6158	-0.632917
	Virus	s__Vibrio phage JSF5				-0.223041
		s__Bovine viral diarrhea virus 1
VDR∆PC	p-value		Bacteria								Virus
			s__[Haemophilus] ducreyi	s__Bacteroides uniformis	s__Faecalibaculum rodentium	s__Cutibacterium acnes	s__Kushneria konosiri	s__Microbacterium sp. LKL04	s__Isosphaera pallida	s__Actinomyces radingae	s__Vibrio phage JSF5
	Bacteria	s__[Haemophilus] ducreyi		0.606363	0.0403992	0.198798	0.0245495	0.194126	0.168648	0.311404	0.33561
		s__Bacteroides uniformis			0.881146	0.952933	0.488672	0.739499	0.817375	0.23256	0.987054
		s__Faecalibaculum rodentium				0.467225	0.651782	0.371458	0.686083	0.480931	0.635523
		s__Cutibacterium acnes					0.296973	0.885155	0.750459	0.994276	3.22532e-07
		s__Kushneria konosiri						0.0379121	0.0636517	0.0759457	0.300741
		s__Microbacterium sp. LKL04							0.164012	0.307188	0.98425
		s__Isosphaera pallida								0.0791601	0.778724
		s__Actinomyces radingae									0.964251
	Virus	s__Vibrio phage JSF5
	Correlation value		Bacteria								Virus
			s__[Haemophilus] ducreyi	s__Bacteroides uniformis	s__Faecalibaculum rodentium	s__Cutibacterium acnes	s__Kushneria konosiri	s__Microbacterium sp. LKL04	s__Isosphaera pallida	s__Actinomyces radingae	s__Vibrio phage JSF5
	Bacteria	s__[Haemophilus] ducreyi		-0.186279	-0.653602	-0.443855	-0.698823	-0.448009	-0.471767	-0.356868	-0.340541
		s__Bacteroides uniformis			0.054495	-0.0215264	0.248543	0.120835	0.0840776	-0.415388	-0.00591832
		s__Faecalibaculum rodentium				0.260529	0.163485	-0.317431	0.146616	0.252842	0.171581
		s__Cutibacterium acnes					0.36692	0.0526463	-0.115609	0.00261656	0.98344
		s__Kushneria konosiri						0.659782	0.605376	0.584536	0.364271
		s__Microbacterium sp. LKL04							0.476314	0.359778	0.0072004
		s__Isosphaera pallida								0.579454	-0.102216
		s__Actinomyces radingae									-0.0163465
	Virus	s__Vibrio phage JSF5
VDR∆Lyz	p-value		Bacteria												Virus
			s__Bifidobacterium pseudolongum	s__Bifidobacterium choerinum	s__Bifidobacterium animalis	s__Ralstonia solanacearum	s__Bordetella pseudohinzii	s__[Haemophilus] ducreyi	s__Chroococcidiopsis thermalis	s__Clostridium perfringens	s__Cutibacterium acnes	s__Streptomyces peucetius	s__Bacteroides acidifaciens	g__Bifidobacterium	s__Lactobacillus phage phiadh	s__Vibrio phage JSF5	s__Cherry green ring mottle virus	s__Bovine viral diarrhea virus 1	s__Lactobacillus phage KC5a	s__Vibrio phage JSF6	s__Avian avulavirus 1	s__Mycobacterium virus Phayonce	f__Podoviridae
	Bacteria	s__Bifidobacterium pseudolongum		0.222916	0.660092	0.871629	0.58	0.879339	0.626892	0.791263	0.505542	0.328608	0.354884	0.975697	0.880446	0.942242	0.519553	0.470886	0.815032	0.82115	0.371356	0.145165	0.504606
		s__Bifidobacterium choerinum			0.00741955	0.0108491	0.00145523	0.0321641	0.321494	0.548762	0.328362	0.0268216	0.264453	0.0148482	0.966358	0.0611712	0.68796	0.117673	0.24957	0.338934	0.311402	0.664114	0.484492
		s__Bifidobacterium animalis				3.99726e-05	0.000860521	2.52151e-05	0.924363	0.0590286	0.438772	0.00635339	0.328539	0.000564789	0.480526	0.149497	0.654984	0.0469926	0.177045	0.0344581	0.340897	0.742812	0.668323
		s__Ralstonia solanacearum					0.00812932	2.02459e-05	0.569572	0.0797904	0.445797	0.0218999	0.229984	0.000715112	0.448386	0.223079	0.596078	0.112518	0.126606	0.0428513	0.468329	0.595915	0.78079
		s__Bordetella pseudohinzii						0.0047801	0.665137	0.0972771	0.195391	0.0012021	0.337874	0.00122856	0.648904	0.0419888	0.971364	0.0823822	0.245363	0.166475	0.271186	0.888859	0.800399
		s__[Haemophilus] ducreyi							0.957904	0.0631452	0.44678	0.025049	0.17857	0.000624953	0.614711	0.29431	0.454785	0.0438792	0.337984	0.0124283	0.537992	0.331024	0.536694
		s__Chroococcidiopsis thermalis								0.582418	0.103951	0.543311	0.73153	0.35943	0.202363	0.233932	0.155423	0.749206	0.0736662	0.452972	0.503014	0.0823125	0.0134025
		s__Clostridium perfringens									0.199416	0.015709	0.761832	0.0175128	0.0227643	0.492074	0.241786	0.340198	0.0719981	0.102823	0.275991	0.931932	0.702477
		s__Cutibacterium acnes										0.50904	0.805378	0.0476814	0.62783	0.0321724	0.75116	0.266987	0.12801	0.9082	0.099649	0.469703	0.0834171
		s__Streptomyces peucetius											0.438715	0.0100734	0.150939	0.300077	0.311243	0.237164	0.215928	0.0765845	0.452609	0.794423	0.844785
		s__Bacteroides acidifaciens												0.26078	0.701534	0.744253	0.603995	0.0359475	0.715779	0.110868	0.536064	0.577936	0.55596
		g__Bifidobacterium													0.320219	0.0757869	0.990717	0.037982	0.10889	0.0735691	0.247224	0.915539	0.768192
	Virus	s__Lactobacillus phage phiadh														0.60623	0.00630565	0.699696	0.145582	0.752577	0.93577	0.216223	0.8245
		s__Vibrio phage JSF5															0.79872	0.658921	0.073293	0.471901	0.25588	0.126639	0.0985163
		s__Cherry green ring mottle virus																0.311868	0.489476	0.536417	0.870052	0.0469799	0.374529
		s__Bovine viral diarrhea virus 1																	0.94239	0.0256336	0.156981	0.563175	0.999894
		s__Lactobacillus phage KC5a																		0.893334	0.0402921	0.281425	0.372809
		s__Vibrio phage JSF6																			0.866989	0.0694183	0.0920112
		s__Avian avulavirus 1																				0.507707	0.297475
		s__Mycobacterium virus Phayonce																					0.0149469
		f__Podoviridae
	Correlation value		Bacteria												Virus
			s__Bifidobacterium pseudolongum	s__Bifidobacterium choerinum	s__Bifidobacterium animalis	s__Ralstonia solanacearum	s__Bordetella pseudohinzii	s__[Haemophilus] ducreyi	s__Chroococcidiopsis thermalis	s__Clostridium perfringens	s__Cutibacterium acnes	s__Streptomyces peucetius	s__Bacteroides acidifaciens	g__Bifidobacterium	s__Lactobacillus phage phiadh	s__Vibrio phage JSF5	s__Cherry green ring mottle virus	s__Bovine viral diarrhea virus 1	s__Lactobacillus phage KC5a	s__Vibrio phage JSF6	s__Avian avulavirus 1	s__Mycobacterium virus Phayonce	f__Podoviridae
	Bacteria	s__Bifidobacterium pseudolongum		0.423264	0.159373	-0.0588878	0.199785	0.0553282	0.175907	-0.096311	-0.239273	0.3452	0.32797	-0.0111115	-0.0548175	-0.0264223	-0.231672	-0.258467	-0.085172	-0.0823156	-0.317495	-0.495648	-0.239783
		s__Bifidobacterium choerinum			0.782816	-0.759332	0.858956	-0.675194	0.349985	0.216091	0.345364	0.691302	0.390577	0.737838	0.0153829	0.609894	0.145701	-0.526829	-0.401935	-0.338347	-0.356869	-0.157389	-0.250861
		s__Bifidobacterium animalis				-0.944081	0.877018	-0.950259	0.0346182	0.613894	0.276816	0.791679	0.345246	0.889747	-0.253068	0.491075	0.161899	-0.638371	-0.463716	-0.668835	-0.337057	0.119253	0.155317
		s__Ralstonia solanacearum					-0.777406	0.952954	-0.20519	-0.578473	-0.272751	-0.708224	-0.417474	-0.882792	0.271261	-0.423129	-0.191522	0.533167	0.516246	0.647756	0.259906	-0.191605	-0.101241
		s__Bordetella pseudohinzii						-0.806938	0.156885	0.553046	0.446878	0.865827	0.339046	0.865062	-0.164913	0.649786	-0.0130928	-0.574493	-0.405213	-0.473889	-0.385555	-0.0509393	-0.0920213
		s__[Haemophilus] ducreyi							0.0192508	-0.606289	-0.272185	-0.69713	-0.462278	-0.886818	0.182046	-0.368803	-0.267593	0.645371	0.338973	0.750271	0.221797	-0.343587	-0.222487
		s__Chroococcidiopsis thermalis								0.198537	0.544116	0.218973	0.124648	0.325055	-0.440724	0.414283	-0.484949	0.116205	-0.588224	0.26863	-0.240653	-0.574599	-0.745078
		s__Clostridium perfringens									0.44331	0.733758	0.110205	0.725689	-0.705075	0.246662	-0.408026	-0.337516	-0.590971	-0.545599	-0.382012	0.0311471	0.138645
		s__Cutibacterium acnes										0.237367	0.0896882	0.636864	-0.175435	0.67517	-0.115275	-0.388679	-0.514625	0.0420401	-0.549829	-0.259132	-0.572926
		s__Streptomyces peucetius											0.276849	0.764125	-0.489571	0.364736	-0.356979	-0.411694	-0.429092	-0.583515	-0.268838	-0.094826	0.0713171
		s__Bacteroides acidifaciens												0.393347	0.139102	-0.118566	0.187483	-0.664859	0.132217	-0.535234	-0.222822	0.200852	-0.212303
		g__Bifidobacterium													-0.350848	0.58479	0.00424357	-0.659604	-0.537737	-0.588383	-0.403759	0.0386685	-0.107193
	Virus	s__Lactobacillus phage phiadh														-0.186346	0.7921	-0.139993	0.495203	0.114601	-0.0293875	0.428844	0.0807532
		s__Vibrio phage JSF5															-0.0928088	-0.159951	-0.588835	0.257896	-0.397075	-0.516207	-0.551359
		s__Cherry green ring mottle virus																-0.356549	0.248098	-0.222634	-0.0596161	0.638399	0.315505
		s__Bovine viral diarrhea virus 1																	0.0263541	0.695178	0.483361	-0.208525	-4.86028e-05
		s__Lactobacillus phage KC5a																		-0.0488782	0.653863	0.378046	0.316583
		s__Vibrio phage JSF6																			0.0610317	-0.595301	-0.560371
		s__Avian avulavirus 1																				0.238092	0.366566
		s__Mycobacterium virus Phayonce																					0.737362
		f__Podoviridae
